# Supplementary material
Source: Springer Nature journal article supplement (https://www.springermedizin.de/resource/supplementary/12885_2011_2655_MOESM3_ESM.pdf/9461674)

**A****% GFP positive cells**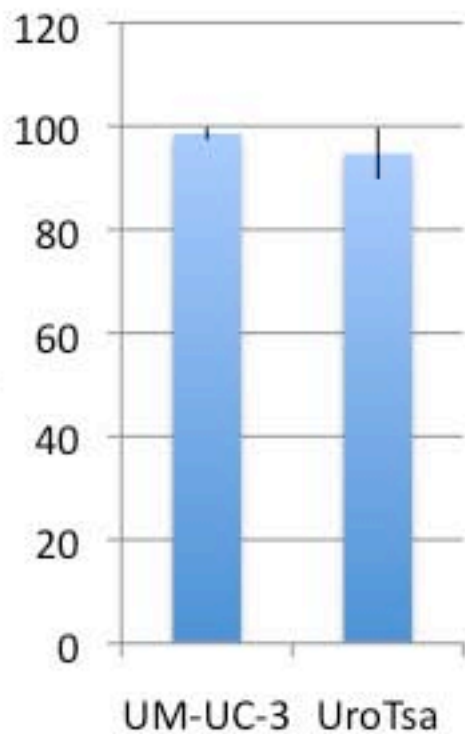**B****% GFP positive cells**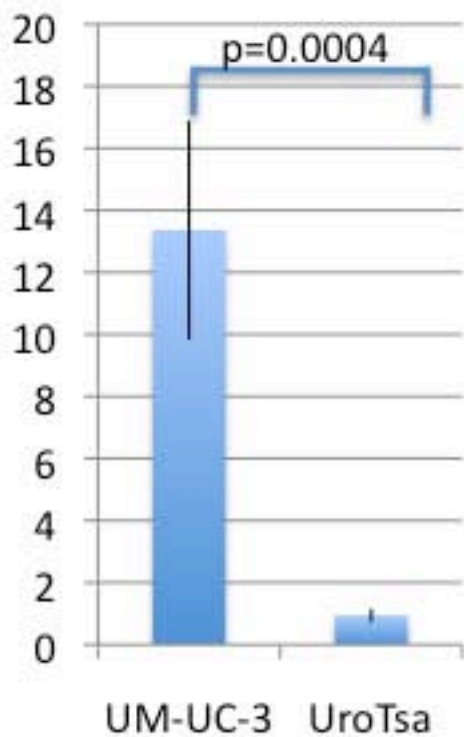

Supplement: MOESM3 [file 9461674]
